# Supplementary material for: Lack of efficacy of fenbendazole against Giardia duodenalis in a naturally infected population of dogs in France
Source: PubMed Central journal article supplement (PMC9621113; doi:10.1051/parasite/2022048), 2022-10-28
Supplement: parasite-29-49-s1.pdf [file parasite-29-49-s1.pdf]

# Lack of efficacy of fenbendazole against *Giardia duodenalis* in a naturally infected population of dogs in France

## Supplementary data

Hugo Kaufmann<sup>1</sup>, Lionel Zenner<sup>1,2</sup>, Slimania Benabed<sup>1,2</sup>, Marie-Thérèse Poirel<sup>1,2</sup>, Gilles Bourgoïn<sup>1,2</sup>

<sup>1</sup> Université de Lyon, VetAgro Sup - Campus Vétérinaire de Lyon, Laboratoire de parasitologie vétérinaire, 1 avenue Bourgelat, BP 83, F-69280 Marcy l'Etoile, France.

<sup>2</sup> Université de Lyon, Université Lyon 1, CNRS, UMR 5558, Laboratoire de Biométrie et Biologie Évolutive F-69622 Villeurbanne, France.

\*Corresponding author: Gilles Bourgoïn<sup>1,2</sup>, [gilles.bourgoïn@vetagro-sup.fr](mailto:gilles.bourgoïn@vetagro-sup.fr)

**Table S1.** Characteristics, duration of clinical signs and deworming habit of dogs included in the study

| Dog no. | Age (months) | Sex    | Weight (kg) | Breed                | Duration of clinical signs (days) | Previous exposure to bdz |
|---------|--------------|--------|-------------|----------------------|-----------------------------------|--------------------------|
| 01      | 5            | Male   | 9           | Border Collie        | 14                                | Yes                      |
| 02      | 4.5          | Female | 11          | Dalmatian            | 10                                | Yes                      |
| 03      | 4.5          | Male   | 13.5        | Australian Shepherd  | > 21                              | Yes                      |
| 04      | 6            | Female | 25          | Beauceron            | > 21                              | Yes                      |
| 05      | 9.5          | Female | 29.5        | Beauceron            | > 21                              | No                       |
| 06      | 15           | Female | 29          | White Swiss Shepherd | > 21                              | Yes                      |
| 07      | 4            | Male   | 15          | White Swiss Shepherd | > 21                              | Yes                      |
| 08      | 22.5         | Female | 17          | Mixed breed          | > 21                              | No                       |
| 09      | 4            | Male   | 17          | Leonberger           | 1                                 | No                       |
| 10      | 2.5          | Male   | 11          | Beauceron            | 3                                 | No                       |
| 11      | 2.5          | Female | 5           | Mixed breed          | 3                                 | No                       |
| 12      | 41           | Male   | 21.5        | Australian Cattle    | Asymptomatic                      | -                        |
| 13      | 13           | Female | 18          | Mixed breed          | 2                                 | No                       |
| 14      | 4            | Female | 12          | Mixed breed          | 14                                | No                       |
| 15      | 2.5          | Male   | 20.2        | Australian Shepherd  | > 21                              | Yes                      |

|    |     |        |      |                        |              |     |
|----|-----|--------|------|------------------------|--------------|-----|
| 16 | 4   | Female | 8    | Australian<br>Shepherd | > 21         | Yes |
| 17 | 4   | Female | 9.1  | Mixed breed            | > 21         | Yes |
| 18 | 4   | Male   | 9.9  | Finnish<br>Lapphund    | 2            | Yes |
| 19 | 5   | Male   | 12.5 | Mixed breed            | > 21         | No  |
| 20 | 3.5 | Male   | 14.2 | Golden<br>Retriever    | > 21         | Yes |
| 21 | 12  | Female | 20.5 | Australian<br>Shepherd | Asymptomatic | Yes |
| 22 | 5.5 | Male   | 17   | Mixed breed            | 3            | Yes |
| 23 | 5.5 | Female | 15.1 | Mixed breed            | > 21         | Yes |

---
